# Supplementary material for: Effects of Oxygen Flow Rate on Metal-to-Insulator Transition Characteristics in NbOx-Based Selectors
Source: MDPI journal article supplement (doi:10.3390/ma15238575), 2022-12-01
Supplement: s1 [file s1]

**Supporting information:**

# **Effect of Oxygen Flow Rate on Metal-to-Insulator Transition Characteristics in NbO<sub>x</sub>-Based Selectors**

**Osung Kwon †, Hongmin Lee †, Sungjun Kim \***

Division of Electronics and Electrical Engineering, Dongguk University, Seoul 04620, Korea

† Correspondence: sungjun@dongguk.edu

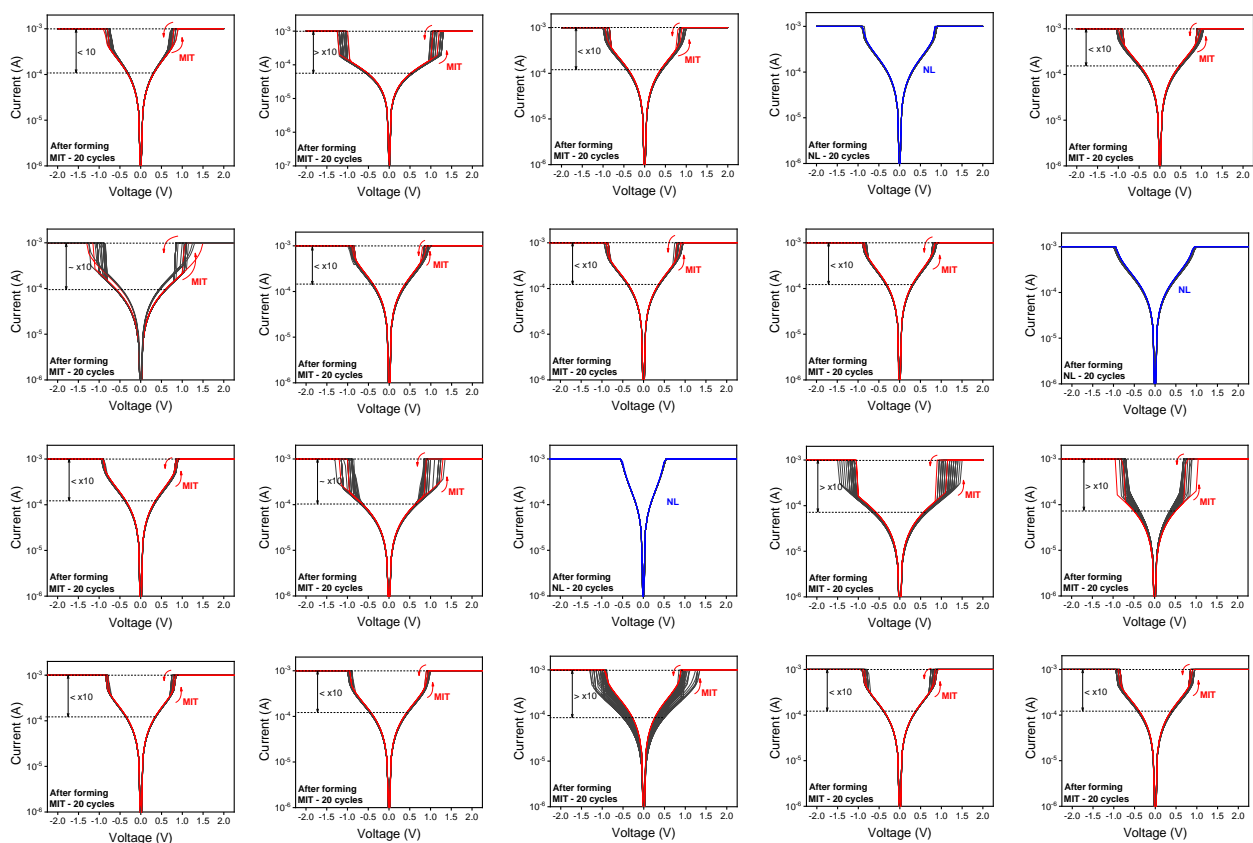

**Figure S1.** I-V curve measuring MIT characteristics in 20 cells of a device fabricated by depositing 3.5 sccm of oxygen flow for 7 min.

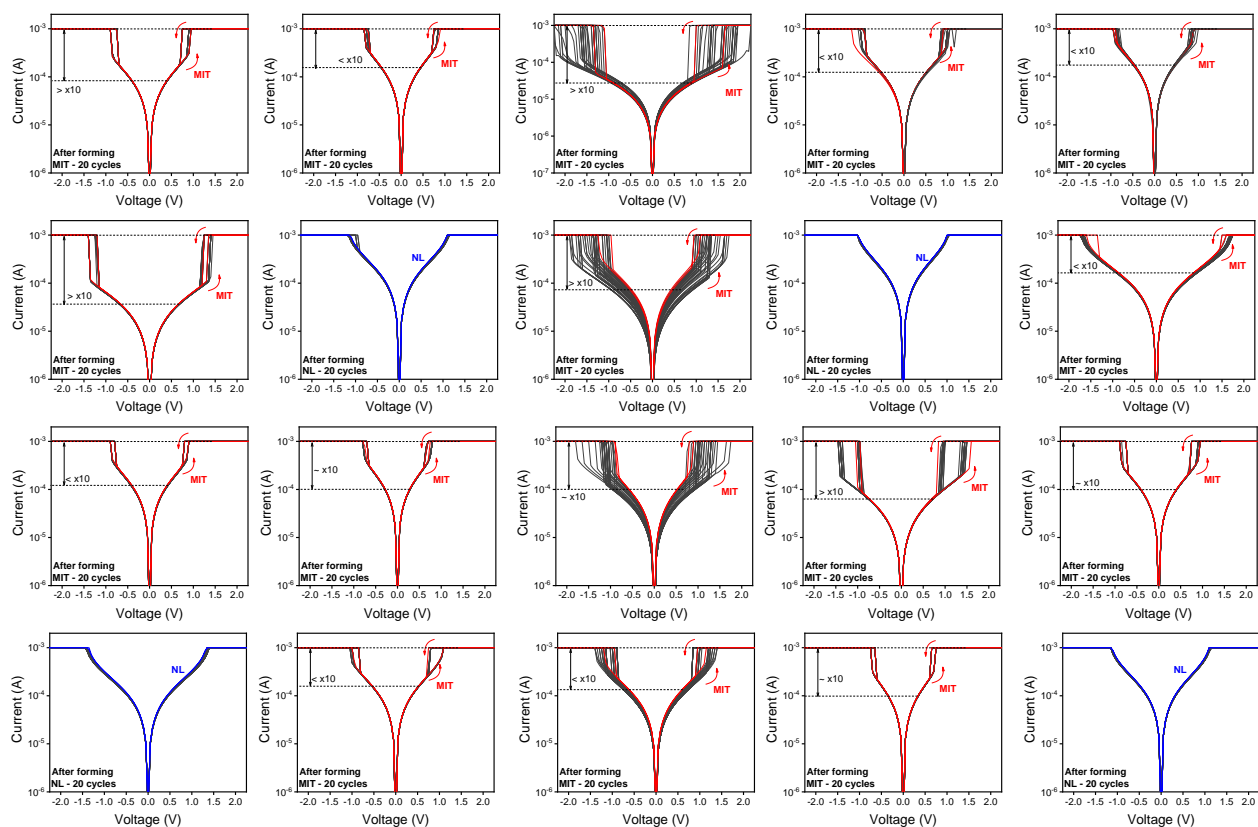

**Figure S2.** I-V curve measuring MIT characteristics in 20 cells of a device fabricated by depositing 3.5 sccm of oxygen flow for 10 min.

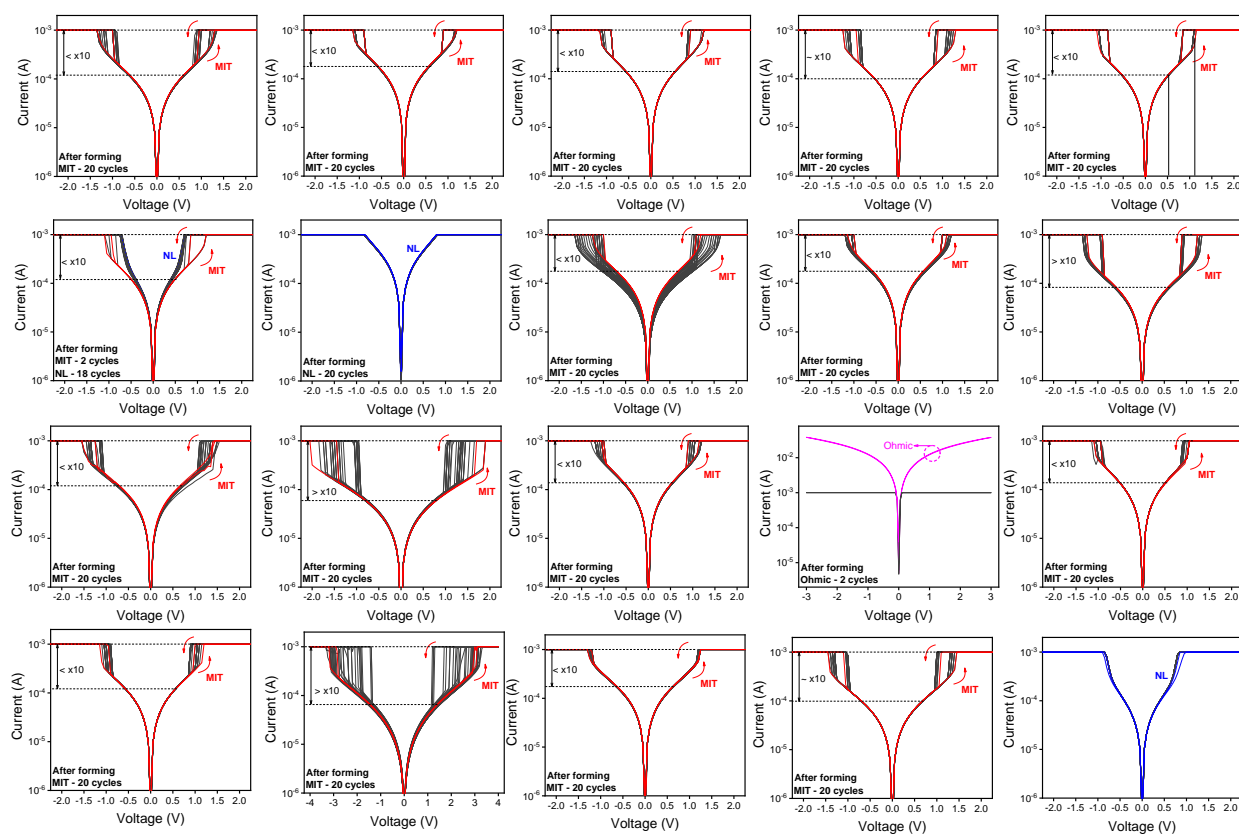

**Figure S3.** I-V curve measuring MIT characteristics in 20 cells of a device fabricated by depositing 3.5 sccm of oxygen flow for 13 min.

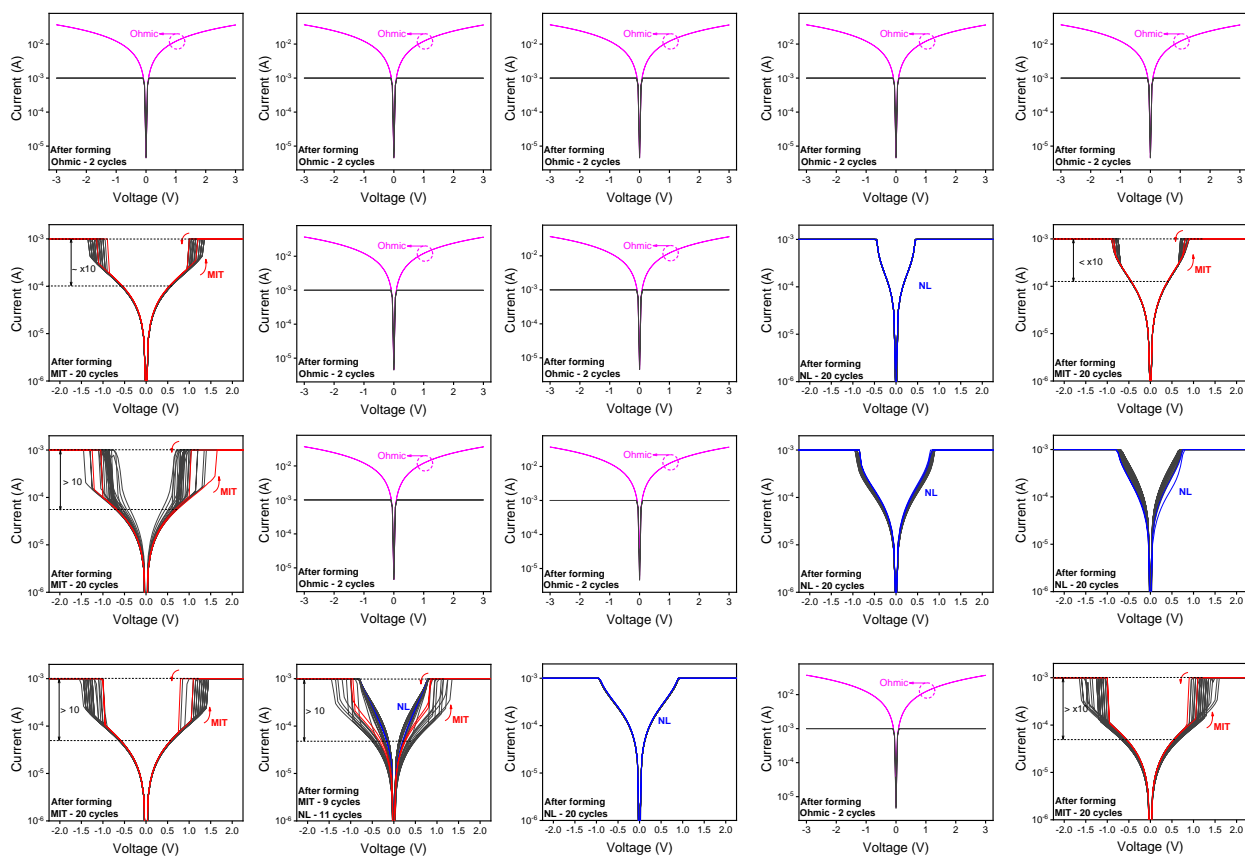

**Figure S4.** I-V curve measuring MIT characteristics in 20 cells of a device fabricated by depositing 4.5 sccm of oxygen flow for 7 min.

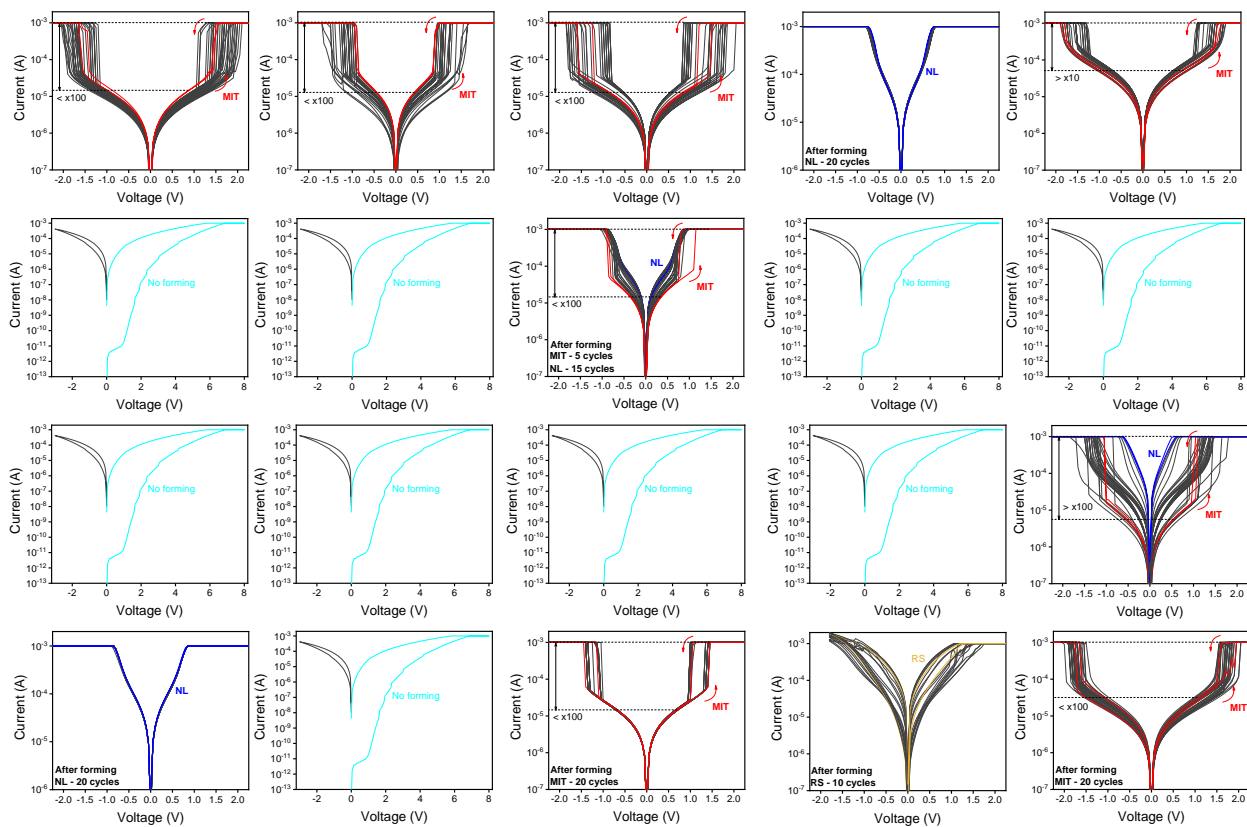

**Figure S5.** I-V curve measuring MIT characteristics in 20 cells of a device fabricated by depositing 4.5 sccm of oxygen flow for 10 min.

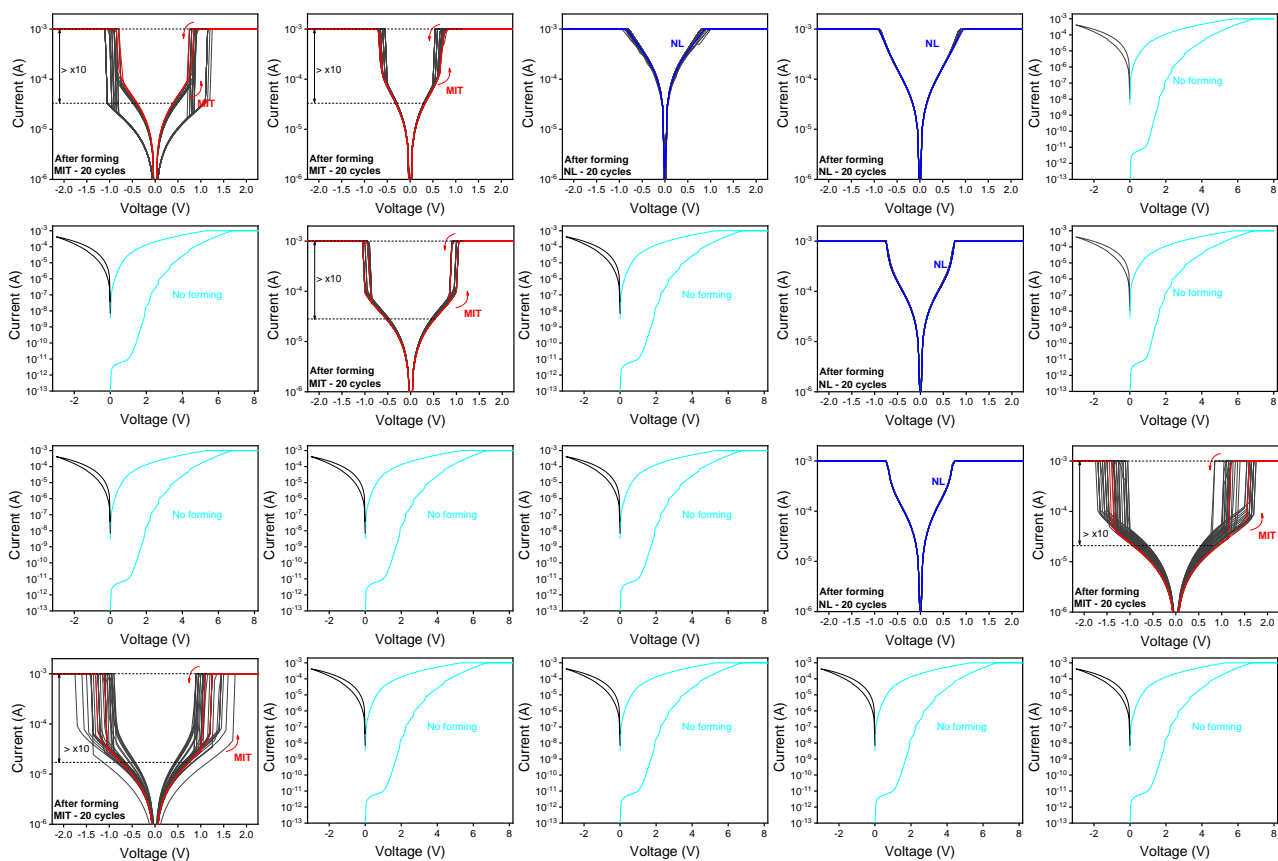

**Figure S6.** I-V curve measuring MIT characteristics in 20 cells of a device fabricated by depositing 4.5 sccm of oxygen flow for 13 min.

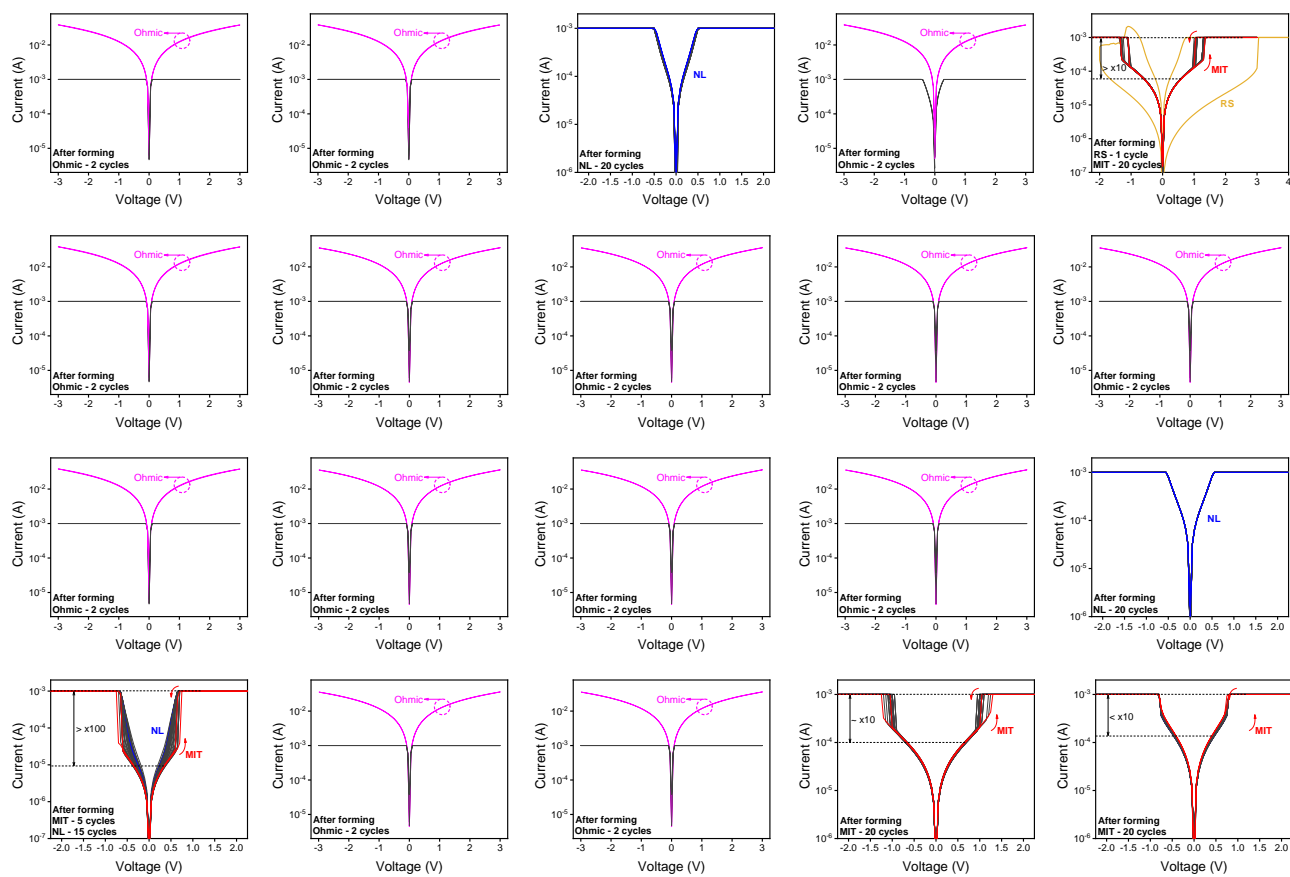

**Figure S7.** I-V curve measuring MIT characteristics in 20 cells of a device fabricated by depositing 5.5 sccm of oxygen flow for 7 min.



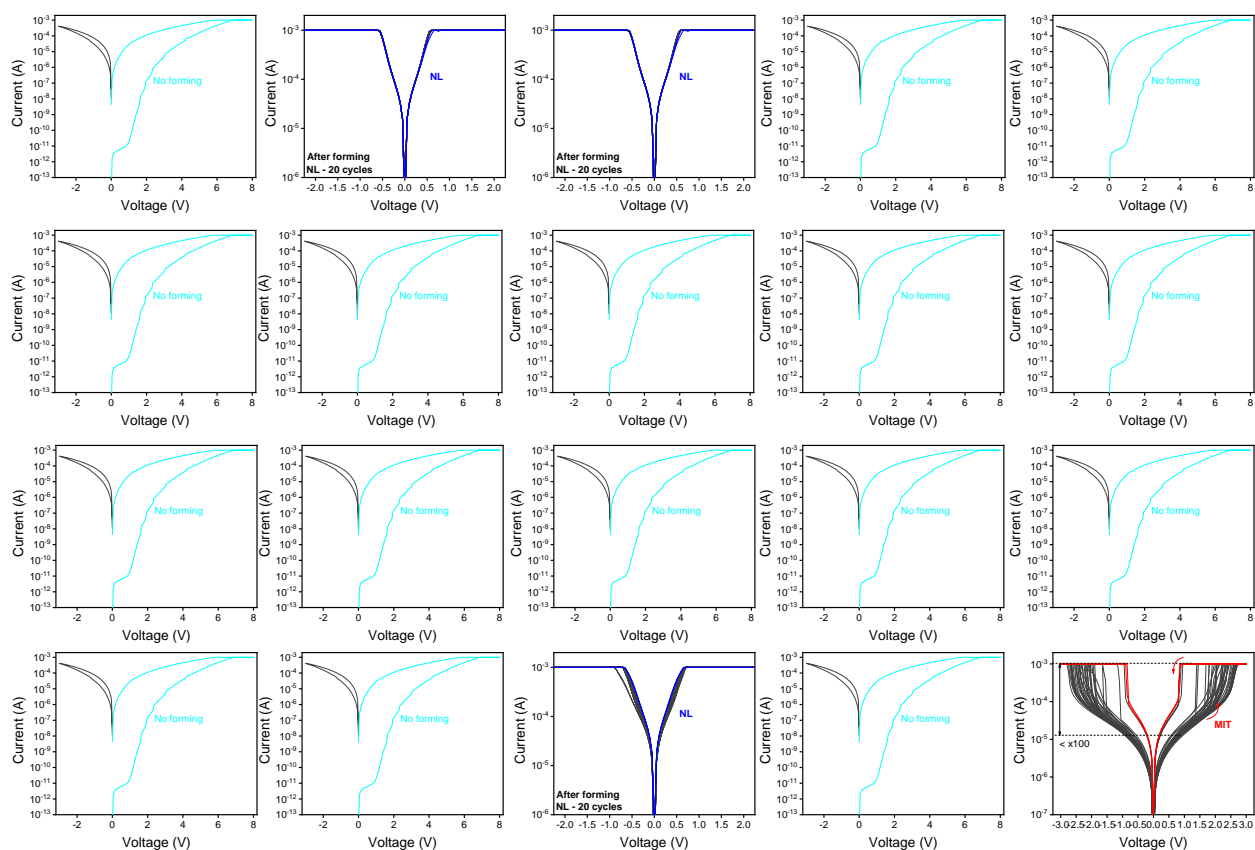

**Figure S8.** I-V curve measuring MIT characteristics in 20 cells of a device fabricated by depositing 5.5 sccm of oxygen flow for 10 min.

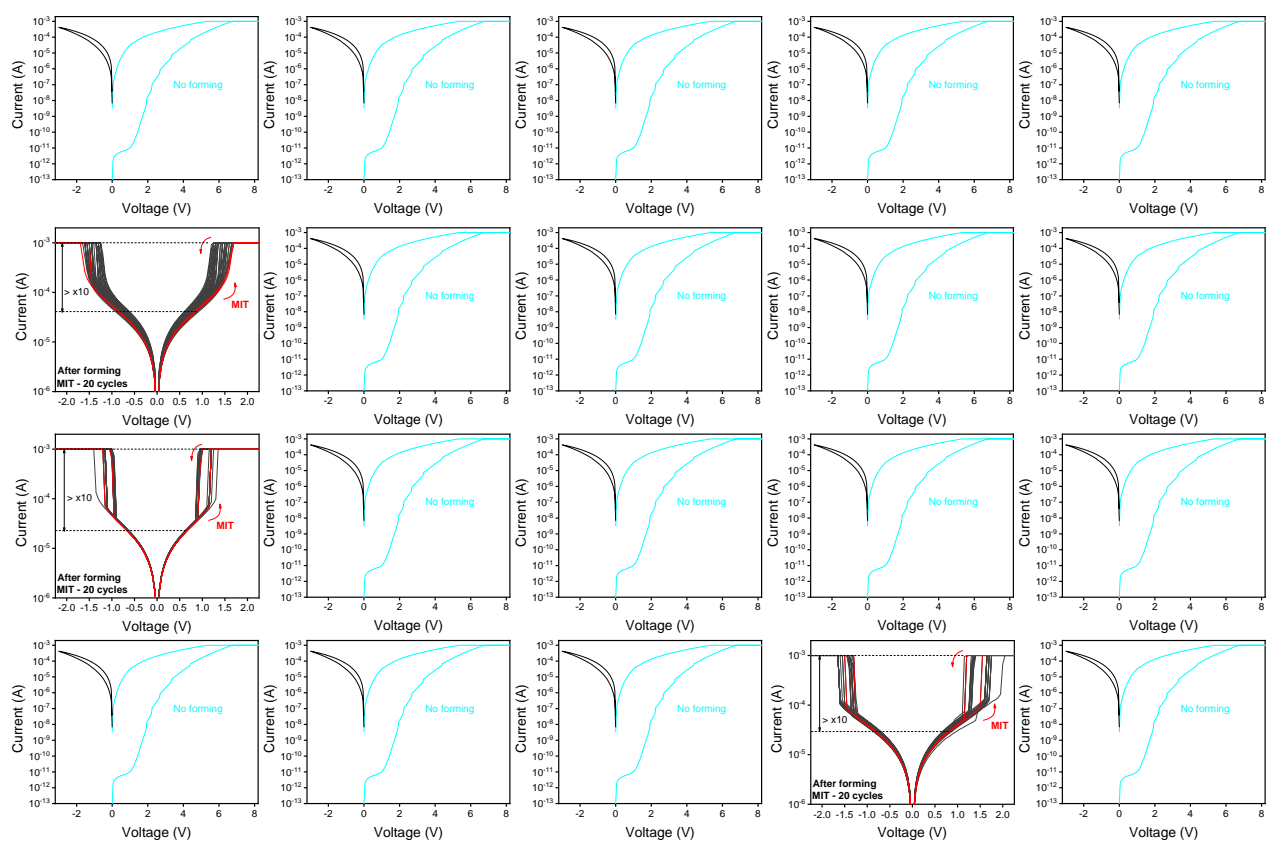

**Figure S9.** I-V curve measuring MIT characteristics in 20 cells of a device fabricated by depositing 5.5 sccm of oxygen flow for 13 min.

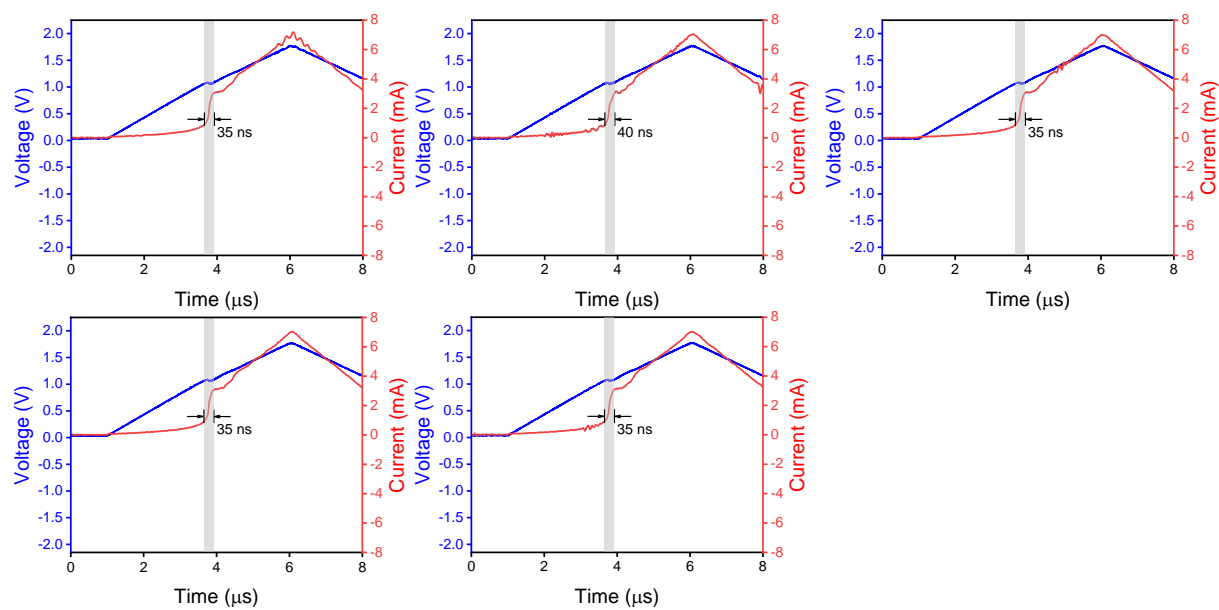

**Figure S10.** Switching time at 5 cells of a device deposited at oxygen flow rate of 3.5 sccm for 7 min.

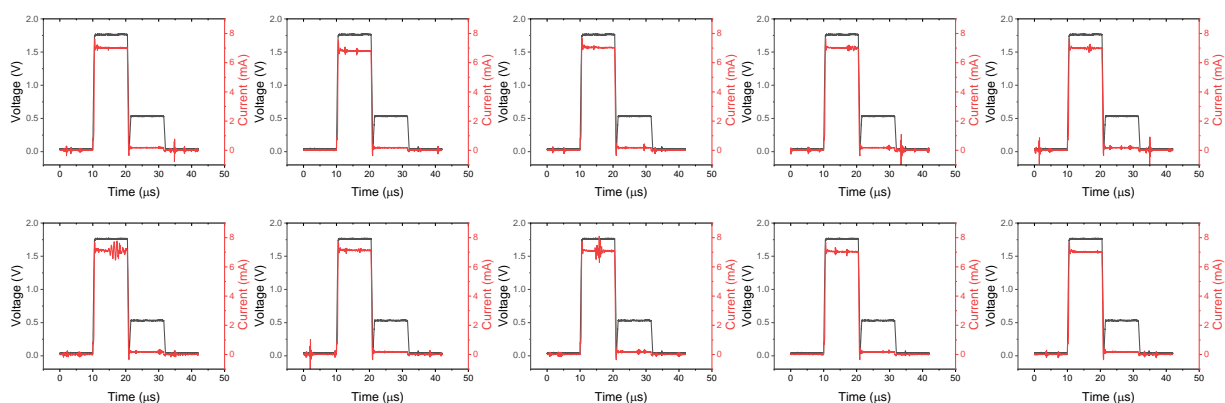

**Figure S11.** Recovery characteristics (50 ns) in 20 cells of a device fabricated by depositing 3.5 sccm of oxygen flow for 7 min.

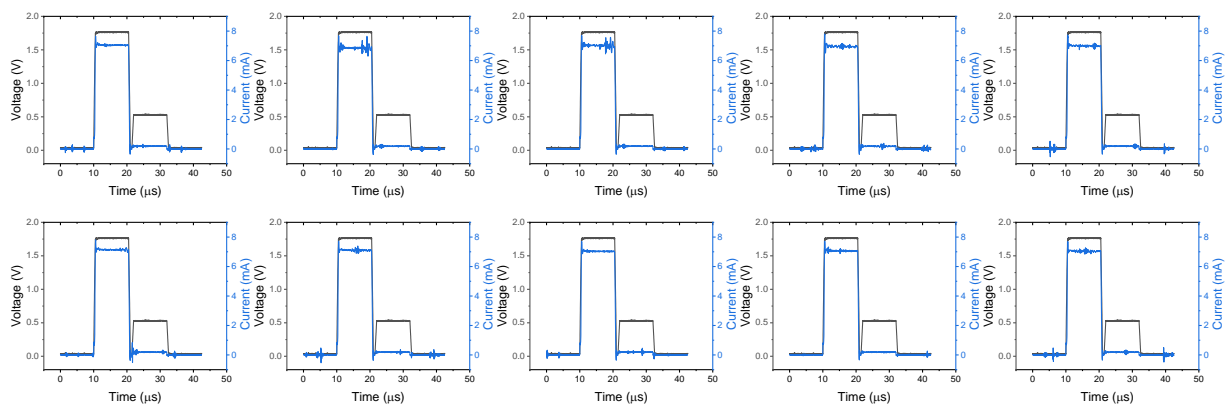

**Figure S12.** Recovery characteristics (500 ns) in 20 cells of a device fabricated by depositing 3.5 sccm of oxygen flow for 7 min.

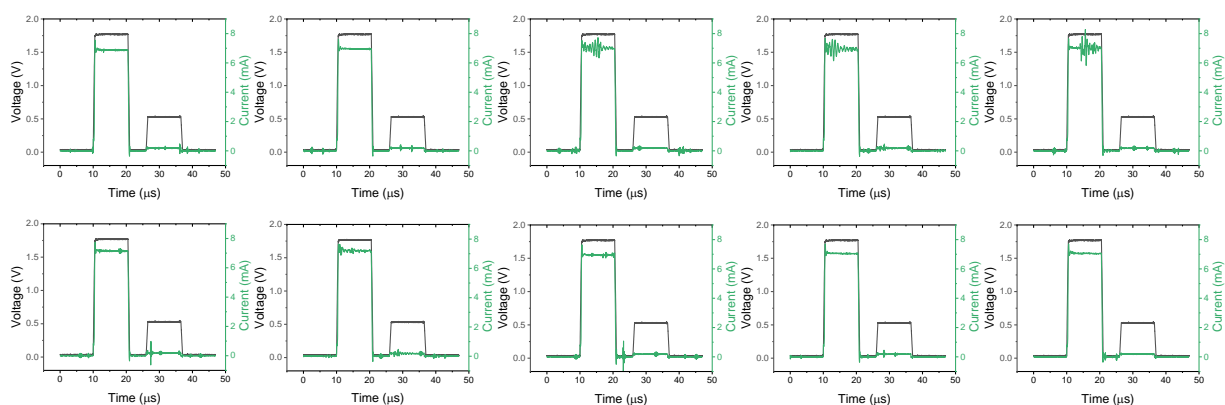

**Figure S13.** Recovery characteristics (5  $\mu\text{s}$ ) in 20 cells of a device fabricated by depositing 3.5 sccm of oxygen flow for 7 min.

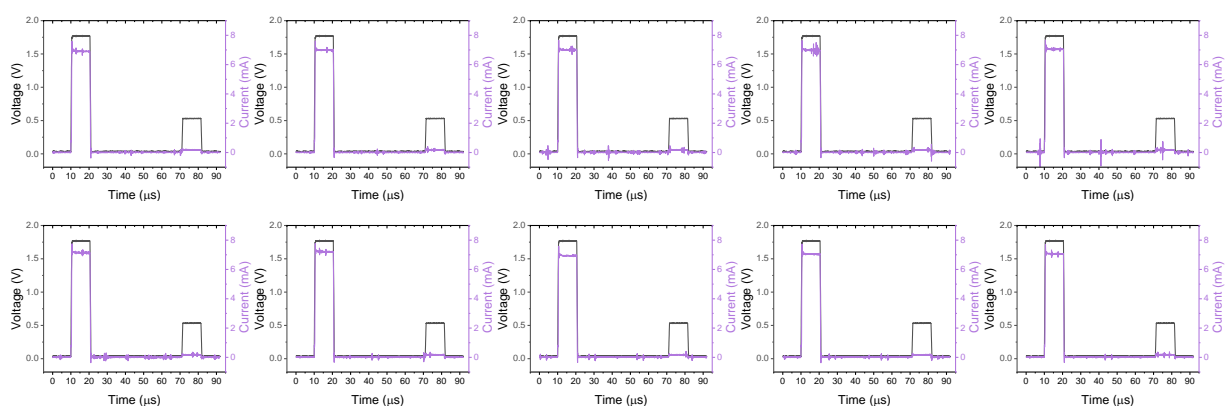

**Figure S14.** Recovery characteristics (50  $\mu\text{s}$ ) in 20 cells of a device fabricated by depositing 3.5 sccm of oxygen flow for 7 min.

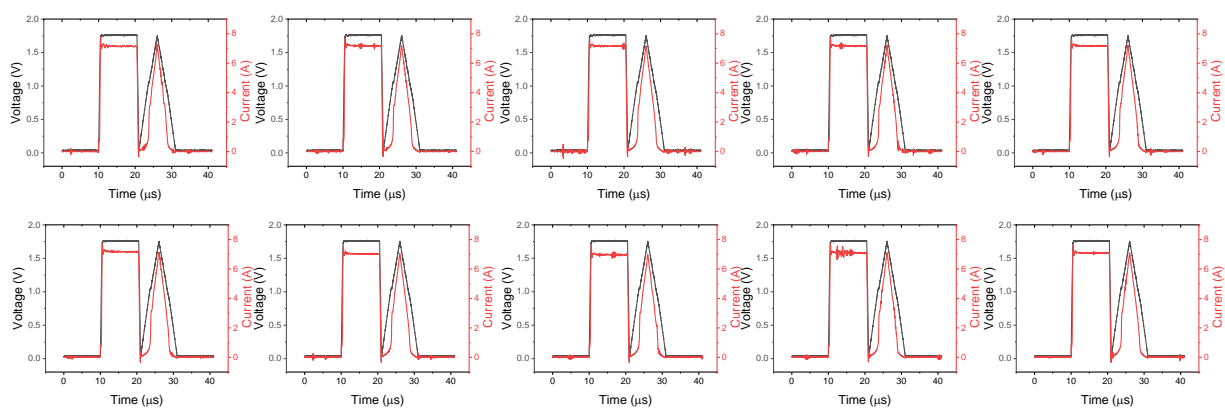

**Figure S15.** Drift characteristics (50 ns) in 20 cells of a device fabricated by depositing 3.5 sccm of oxygen flow for 7 min.

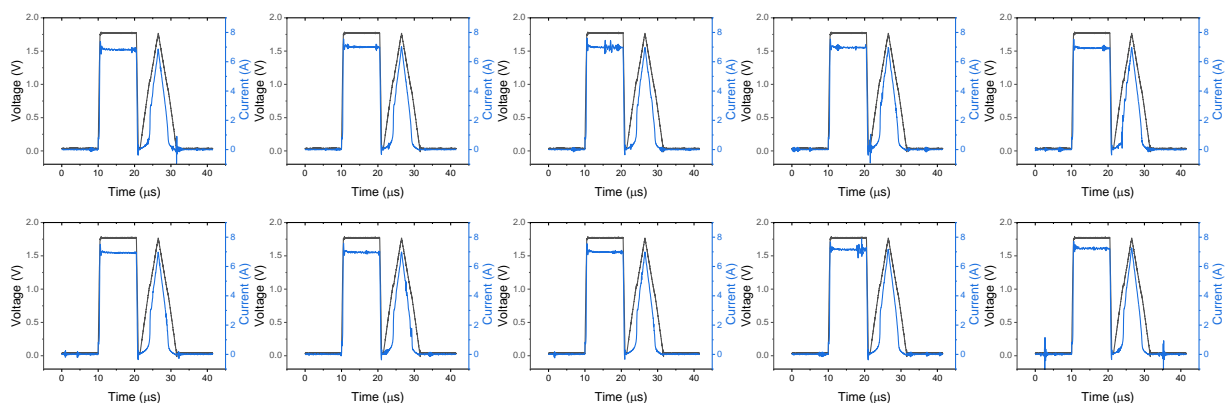

**Figure S16.** Drift characteristics (500 ns) in 20 cells of a device fabricated by depositing 3.5 sccm of oxygen flow for 7 min.

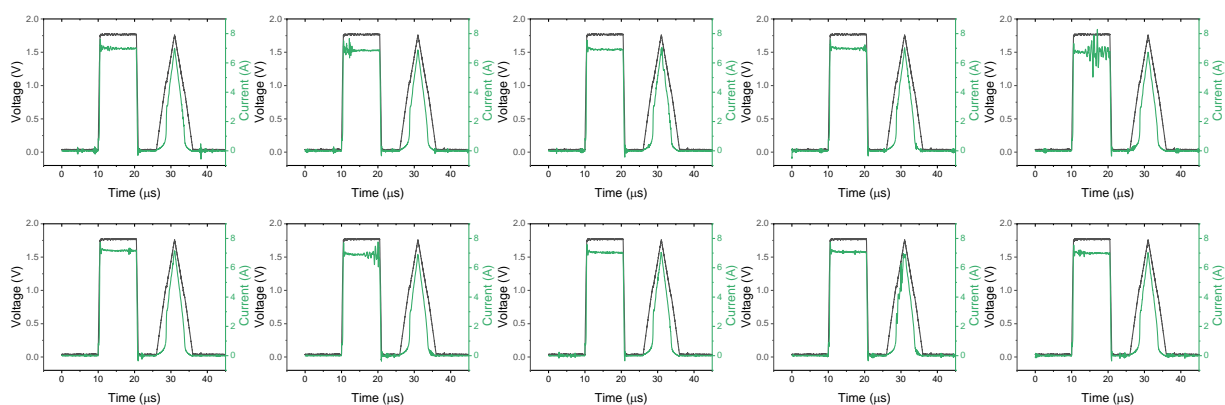

**Figure S17.** Drift characteristics (5  $\mu$ s) in 20 cells of a device fabricated by depositing 3.5 sccm of oxygen flow for 7 min.

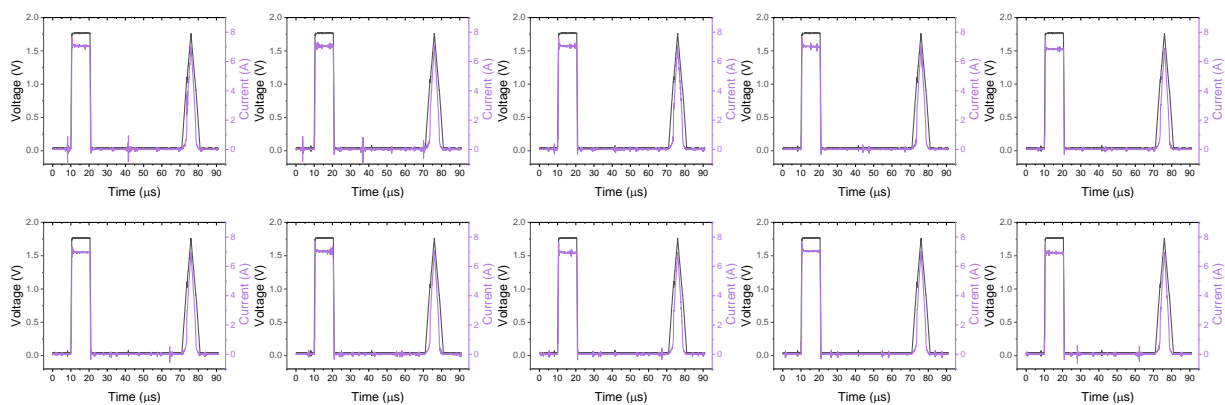

**Figure S18.** Drift characteristics (50  $\mu$ s) in 20 cells of a device fabricated by depositing 3.5 sccm of oxygen flow for 7 min.
